# Supplementary material for: A Comparative Analysis of Naïve Exosomes and Enhanced Exosomes with a Focus on the Treatment Potential in Ovarian Disorders
Source: Preprints.org preprint supplement (doi:10.20944/preprints202404.0003.v1), 2024-04-01
Supplement: Supplementary file 1 [file supplementary]

| No | Name | Fold change | No | Name | Fold change | No | Name | | Fold change |
| --- | --- | --- | --- | --- | --- | --- | --- | --- | --- |
| All Proteins | | | | | | | | | |
| 1 | HIST2H3A | 5.415774 | 43 | CAPRIN1 | 2.030893 | **85** | ILF3 | 1.574275 | |
| 2 | LAMA5 | 4.912965 | **44** | USP15 | 1.99445 | **86** | MATR3 | 1.573667 | |
| 3 | APLP2 | 4.839289 | **45** | SPTAN1 | 1.946298 | **87** | MRC2 | 1.567592 | |
| 4 | FXR1 | 4.057065 | **46** | PXDN | 1.927531 | **88** | PSMG1 | 1.542099 | |
| 5 | EFEMP1 | 3.848948 | **47** | FKBP9 | 1.915003 | **89** | TUBAL3 | 1.541929 | |
| 6 | SF3B3 | 3.700617 | **48** | AP1M1 | 1.902163 | **90** | ACTG1 | 1.537505 | |
| 7 | HTRA1 | 3.521209 | **49** | EIF4G1 | 1.879045 | **91** | TPM2 | 1.524892 | |
| 8 | UBA2 | 3.384767 | **50** | RAB2A | 1.874018 | **92** | PTBP1 | 1.522484 | |
| 9 | MMP19 | 3.333479 | **51** | NXN | 1.86393 | **93** | SEC23A | 1.522406 | |
| 10 | SRPX | 3.321563 | **52** | DDX39A | 1.863168 | **94** | PTPN1 | 1.517119 | |
| 11 | HMGA2 | 3.281848 | **53** | NUDT21 | 1.850507 | **95** | NID2 | 1.514909 | |
| 12 | PTGES3 | 3.264797 | **54** | AARS | 1.835753 | **96** | GLS | 1.513476 | |
| 13 | PREP | 3.107649 | **55** | LRRC17 | 1.804368 | **97** | SF3B1 | 1.502484 | |
| 14 | MGAT5 | 2.894506 | **56** | PSME3 | 1.801918 | **98** | XRCC5 | 1.502248 | |
| 15 | RHOA | 2.882499 | **57** | IAH1 | 1.797593 | **99** | SPTBN1 | 1.500168 | |
| 16 | ADD3 | 2.85615 | **58** | CRTAP | 1.788128 | **100** | NUP93 | 1.494096 | |
| 17 | CDC42BPB | 2.853821 | **59** | MFAP4 | 1.785901 | **101** | YWHAE | 1.489433 | |
| 18 | UNC45A | 2.850593 | **60** | NUCB1 | 1.783986 | **102** | ECH1 | 1.487053 | |
| 19 | CDH23 | 2.80839 | **61** | HNRNPR | 1.776111 | **103** | SPON2 | 1.468898 | |
| 20 | PGAM5 | 2.806167 | **62** | UGGT1 | 1.763243 | **104** | NUP98 | 1.466304 | |
| 21 | PAM | 2.766931 | **63** | POSTN | 1.758704 | **105** | PFKM | 1.461211 | |
| 22 | RSU1 | 2.674164 | **64** | SEC24D | 1.75617 | **106** | EEF1D | 1.44615 | |
| 23 | ARL1 | 2.633532 | **65** | DRG2 | 1.750284 | **107** | ADSL | 1.431011 | |
| 24 | SNRPD1 | 2.589605 | **66** | ARMT1 | 1.74827 | **108** | RPS24 | 1.428671 | |
| 25 | GNPAT | 2.537942 | **67** | TOP1 | 1.733486 | **109** | CAPN2 | 1.425369 | |
| 26 | MCM4 | 2.492846 | **68** | RCN1 | 1.729342 | **110** | NAP1L1 | 1.411412 | |
| 27 | SDF4 | 2.474751 | **69** | TIMM44 | 1.722561 | **111** | LTBP1 | 1.402398 | |
| 28 | SMARCA5 | 2.467528 | **70** | ALDH9A1 | 1.711249 | **112** | FBLN1 | 1.392655 | |
| 29 | HEATR1 | 2.418155 | **71** | UGP2 | 1.70947 | **113** | SYNCRIP | 1.391316 | |
| 30 | MCM2 | 2.387727 | **72** | NUP133 | 1.707811 | **114** | FKBP11 | 1.390567 | |
| 31 | ANTXR1 | 2.379471 | **73** | CLU | 1.706395 | **115** | HNRNPA1 | 1.383585 | |
| 32 | PRKAG1 | 2.320002 | **74** | NACA | 1.704063 | **116** | HNRNPA3 | 1.376628 | |
| 33 | TRAP1 | 2.287293 | **75** | CSE1L | 1.701936 | **117** | HNRNPK | 1.375381 | |
| 34 | EIF3H | 2.207335 | **76** | AGRN | 1.694546 | **118** | EMILIN1 | 1.372395 | |
| 35 | RPS15 | 2.185175 | **77** | GBE1 | 1.691186 | **119** | CLSTN1 | 1.370861 | |
| 36 | MATN3 | 2.174195 | **78** | CCAR2 | 1.688942 | **120** | IFI16 | 1.355165 | |
| 37 | MATN2 | 2.14227 | **79** | MTDH | 1.68379 | **121** | SERPINF1 | 1.35243 | |
| 38 | TOP2B | 2.130412 | **80** | COPE | 1.683695 | **122** | HADHA | 1.349318 | |
| 39 | BTF3 | 2.125791 | **81** | PSME1 | 1.675359 | **123** | CNN2 | 1.347437 | |
| 40 | CHD4 | 2.092596 | **82** | NAMPT | 1.654905 | **124** | FASN | 1.341763 | |
| 41 | PRMT1 | 2.081544 | **83** | MLEC | 1.644746 | **125** | RPS7 | 1.336084 | |
| 42 | NDUFA12 | 2.057606 | **84** | GOLT1B | 1.599967 | **126** | NCKAP1 | 1.327883 | |
| 127 | LAP3 | 1.324775 | **149** | EIF3CL | 1.200711 | **171** | ACO2 | 1.064816 | |
| 128 | SEC61G | 1.324226 | **150** | COMT | 1.19536 | **172** | CCDC148 | | 1.061061 |
| 129 | XRCC6 | 1.323747 | **151** | DDX5 | 1.191062 | **173** | COPS3 | | 1.055834 |
| 130 | EIF2S3 | 1.292177 | **152** | STOML2 | 1.174188 | **174** | TGFBI | | 1.049859 |
| 131 | PDLIM5 | 1.286318 | **153** | MAN2A1 | 1.171845 | **175** | PSMD5 | | 1.049785 |
| 132 | NCL | 1.285363 | **154** | SRP9 | 1.164959 | **176** | CAPN1 | | 1.049089 |
| 133 | RBBP7 | 1.281747 | **155** | LMNA | 1.156099 | **177** | GDI2 | | 1.047599 |
| 134 | NT5DC2 | 1.280941 | **156** | HSPG2 | 1.14336 | **178** | TM9SF2 | | 1.047567 |
| 135 | TIA1 | 1.256574 | **157** | CCT5 | 1.13923 | **179** | PGM3 | | 1.041765 |
| 136 | MAMDC2 | 1.253956 | **158** | KARS | 1.135454 | **180** | SPOCK1 | | 1.039038 |
| 137 | LARS | 1.249013 | **159** | EEF2 | 1.130744 | **181** | EPRS | | 1.033018 |
| 138 | HSPH1 | 1.240383 | **160** | SRSF1 | 1.129664 | **182** | COL14A1 | | 1.031871 |
| 139 | THBS2 | 1.239299 | **161** | COPB1 | 1.102414 | **183** | NTMT1 | | 1.029058 |
| 140 | TOMM70 | 1.235044 | **162** | IPO5 | 1.101549 | **184** | AEBP1 | | 1.025879 |
| 141 | PCOLCE | 1.233321 | **163** | TCP1 | 1.094213 | **185** | SERPINH1 | | 1.025467 |
| 142 | QPCT | 1.23047 | **164** | SDHB | 1.076817 | **186** | ASPH | | 1.024545 |
| 143 | ATAD3A | 1.223842 | **165** | PDIA6 | 1.074409 | **187** | COPS2 | | 1.022048 |
| 144 | TTLL12 | 1.21968 | **166** | HNRNPA2B1 | 1.073607 | **188** | RBM39 | | 1.019784 |
| 145 | TRA2B | 1.218602 | **167** | RPLP2 | 1.072141 | **189** | EIF2S1 | | 1.014637 |
| 146 | EEF1G | 1.214396 | **168** | DDX3X | 1.067722 | **190** | SNX4 | | 1.011258 |
| 147 | SRI | 1.212749 | **169** | NID1 | 1.067117 | **191** | IMPDH2 | | 1.003026 |
| 148 | CBR1 | 1.205816 | **170** | GFPT1 | 1.065445 |  |  | |  |
| Extracellular vesicle Proteins | | | | | | | | | |
| 1 | HIST2H3A | 5.415774 | **24** | NUCB1 | 1.783985 | **46** | FBLN1 | | 1.39266 |
| 2 | LAMA5 | 4.91297 | **25** | UGGT1 | 1.763242 | **47** | HNRNPA1 | | 1.383585 |
| 3 | APLP2 | 4.839288 | **26** | POSTN | 1.758705 | **48** | HNRNPK | | 1.375375 |
| 4 | EFEMP1 | 3.848946 | **27** | ALDH9A1 | 1.711245 | **49** | EMILIN1 | | 1.372395 |
| 5 | HTRA1 | 3.521209 | **28** | UGP2 | 1.70947 | **50** | CLSTN1 | | 1.37086 |
| 7 | MMP19 | 3.333482 | **29** | CLU | 1.706395 | **51** | SERPINF1 | | 1.35243 |
| 8 | MGAT5 | 2.894505 | **30** | CSE1L | 1.70194 | **52** | CNN2 | | 1.347439 |
| 9 | RHOA | 2.882499 | **31** | AGRN | 1.694545 | **53** | FASN | | 1.341765 |
| 10 | CDC42BPB | 2.853816 | **32** | GBE1 | 1.691186 | **54** | NCKAP1 | | 1.327882 |
| 11 | PAM | 2.766933 | **33** | PSME1 | 1.675363 | **55** | LAP3 | | 1.324778 |
| 12 | RSU1 | 2.674161 | **34** | NAMPT | 1.654908 | **56** | XRCC6 | | 1.323745 |
| 13 | SDF4 | 2.474751 | **35** | ILF3 | 1.574274 | **57** | EIF2S3 | | 1.292175 |
| 14 | EIF3H | 2.207334 | **36** | ACTG1 | 1.537505 | **58** | NCL | | 1.285365 |
| 15 | MATN3 | 2.174198 | **37** | PTBP1 | 1.522484 | **59** | MAMDC2 | | 1.253958 |
| 16 | MATN2 | 2.142269 | **38** | NID2 | 1.51491 | **60** | HSPH1 | | 1.240385 |
| 17 | SPTAN1 | 1.946295 | **39** | XRCC5 | 1.50225 | **61** | THBS2 | | 1.239295 |
| 18 | PXDN | 1.927535 | **40** | SPTBN1 | 1.500175 | **62** | TOMM70 | | 1.235046 |
| 19 | AP1M1 | 1.90216 | **41** | YWHAE | 1.489435 | **63** | PCOLCE | | 1.23332 |
| 20 | RAB2A | 1.874022 | **42** | ECH1 | 1.487053 | **64** | QPCT | | 1.230471 |
| 21 | AARS | 1.835753 | **43** | SPON2 | 1.468895 | **65** | EEF1G | | 1.2144 |
| 22 | CRTAP | 1.804366 | **44** | CAPN2 | 1.42537 | **66** | SRI | | 1.21275 |
| 23 | MFAP4 | 1.788129 | **45** | LTBP1 | 1.402395 | **67** | CBR1 | | 1.205814 |
| 68 | COMT | 1.19536 | **76** | PDIA6 | 1.07441 | **84** | GDI2 | | 1.0476 |
| 69 | DDX5 | 1.19106 | **77** | HNRNPA2B1 | 1.07361 | **85** | TM9SF2 | | 1.047571 |
| 70 | MAN2A1 | 1.171845 | **78** | RPLP2 | 1.072145 | **86** | SPOCK1 | | 1.03904 |
| 71 | HSPG2 | 1.14336 | **79** | DDX3X | 1.06772 | **87** | COL14A1 | | 1.031875 |
| 72 | CCT5 | 1.13923 | **80** | NID1 | 1.06712 | **88** | AEBP1 | | 1.025875 |
| 73 | KARS | 1.135458 | **81** | GFPT1 | 1.06544 | **89** | SERPINH1 | | 1.025465 |
| 74 | EEF2 | 1.13075 | **82** | TGFBI | 1.049855 | **90** | EIF2S1 | | 1.014636 |
| 75 | TCP1 | 1.09421 | **83** | CAPN1 | 1.04909 | **91** | IMPDH2 | | 1.003025 |
| Exosome Proteins | | | | | | | | | |
| 1 | HIST2H3A | 5.415775 | **25** | GBE1 | 1.691186 | **49** | QPCT | | 1.230471 |
| 2 | LAMA5 | 4.91297 | **26** | PSME1 | 1.675363 | **50** | EEF1G | | 1.2144 |
| 3 | APLP2 | 4.839288 | **27** | NAMPT | 1.654908 | **51** | SRI | | 1.21275 |
| 4 | EFEMP1 | 3.848946 | **28** | ACTG1 | 1.537505 | **52** | CBR1 | | 1.205814 |
| 5 | HTRA1 | 3.521209 | **29** | PTBP1 | 1.522484 | **53** | COMT | | 1.19536 |
| 6 | MGAT5 | 2.894505 | **30** | NID2 | 1.51491 | **54** | DDX5 | | 1.19106 |
| 7 | RHOA | 2.882499 | **31** | SPTBN1 | 1.500175 | **55** | MAN2A1 | | 1.171845 |
| 8 | CDC42BPB | 2.853816 | **32** | YWHAE | 1.489435 | **56** | HSPG2 | | 1.14336 |
| 9 | PAM | 2.766933 | **33** | ECH1 | 1.487053 | **57** | CCT5 | | 1.13923 |
| 10 | RSU1 | 2.674161 | **34** | SPON2 | 1.468895 | **58** | EEF2 | | 1.13075 |
| 11 | SDF4 | 2.474751 | **35** | CAPN2 | 1.42537 | **59** | TCP1 | | 1.09421 |
| 12 | EIF3H | 2.207334 | **36** | FBLN1 | 1.39266 | **60** | PDIA6 | | 1.07441 |
| 13 | SPTAN1 | 1.946295 | **37** | HNRNPA1 | 1.383585 | **61** | HNRNPA2B1 | | 1.07361 |
| 14 | PXDN | 1.927535 | **38** | HNRNPK | 1.375375 | **62** | RPLP2 | | 1.072145 |
| 15 | AP1M1 | 1.90216 | **39** | EMILIN1 | 1.372395 | **63** | DDX3X | | 1.06772 |
| 16 | RAB2A | 1.874022 | **40** | SERPINF1 | 1.35243 | **64** | NID1 | | 1.06712 |
| 17 | AARS | 1.835753 | **41** | FASN | 1.341765 | **65** | GFPT1 | | 1.06544 |
| 18 | NUCB1 | 1.783985 | **42** | NCKAP1 | 1.327882 | **66** | TGFBI | | 1.049855 |
| 19 | UGGT1 | 1.763242 | **43** | LAP3 | 1.324778 | **67** | CAPN1 | | 1.04909 |
| 20 | ALDH9A1 | 1.711245 | **44** | EIF2S3 | 1.292175 | **68** | GDI2 | | 1.0476 |
| 21 | UGP2 | 1.70947 | **45** | NCL | 1.285365 | **69** | TM9SF2 | | 1.047571 |
| 22 | CLU | 1.706395 | **46** | HSPH1 | 1.240385 | **70** | AEBP1 | | 1.025875 |
| 23 | CSE1L | 1.70194 | **47** | TOMM70 | 1.235046 | **71** | EIF2S1 | | 1.014636 |
| 24 | AGRN | 1.694545 | **48** | PCOLCE | 1.23332 | **72** | IMPDH2 | | 1.003025 |
