# Supplementary figures and images for: A Comparative Analysis of Naïve Exosomes and Enhanced Exosomes with a Focus on the Treatment Potential in Ovarian Disorders
Source: Preprints.org preprint supplement (doi:10.20944/preprints202404.0003.v1), 2024-04-01

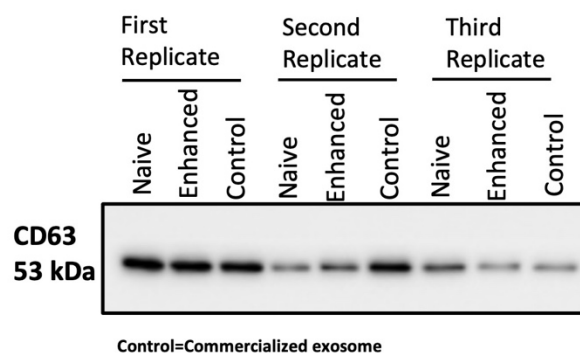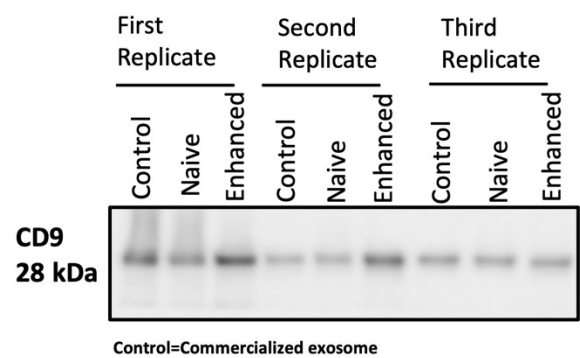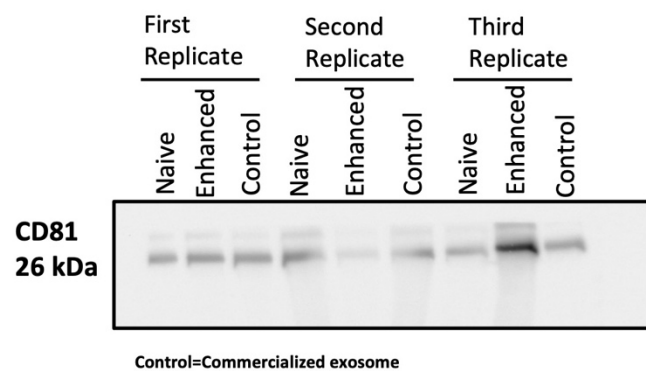

Supplement: Supplementary file 1 [file supplementary]
